# Supplementary material for: Racial/ethnic differences in the outcomes of patients with metastatic breast cancer: contributions of demographic, socioeconomic, tumor and metastatic characteristics
Source: Springer Nature journal article supplement (doi:10.1007/s10549-018-4956-y), 2018-10-06
Supplement: MOESM1 [file 16179598]

# SUPPLEMENTARY INFORMATION

## **Racial/ethnic differences in the outcomes of patients with metastatic breast cancer: contributions of demographic, socioeconomic, tumor and metastatic characteristics**

Jin-Xiao Ren<sup>1,2†</sup>, Yue Gong<sup>1,2†</sup>, Hong Ling<sup>1</sup>, Xin Hu<sup>1\*</sup>, Zhi-Ming, Shao<sup>1,2,3\*</sup>

<sup>1</sup>Department of Breast Surgery, Key Laboratory of Breast Cancer in Shanghai, Fudan University

Shanghai Cancer Center, Fudan University, Shanghai, 200032, China

<sup>2</sup>Department of Oncology, Shanghai Medical College, Fudan University, Shanghai, 200032, China

<sup>3</sup>Institutes of Biomedical Science, Fudan University, Shanghai, 200032, China

†Both authors contributed equally and share co-first authorship.

\*Corresponding authors: Xin Hu, e-mail: [xinhu@fudan.edu.com](mailto:xinhu@fudan.edu.com); Zhi-Ming Shao, email:

[zhi\\_ming\\_shao@163.com](mailto:zhi_ming_shao@163.com)

- 1 Supplementary Figure
- 4 Supplementary Tables

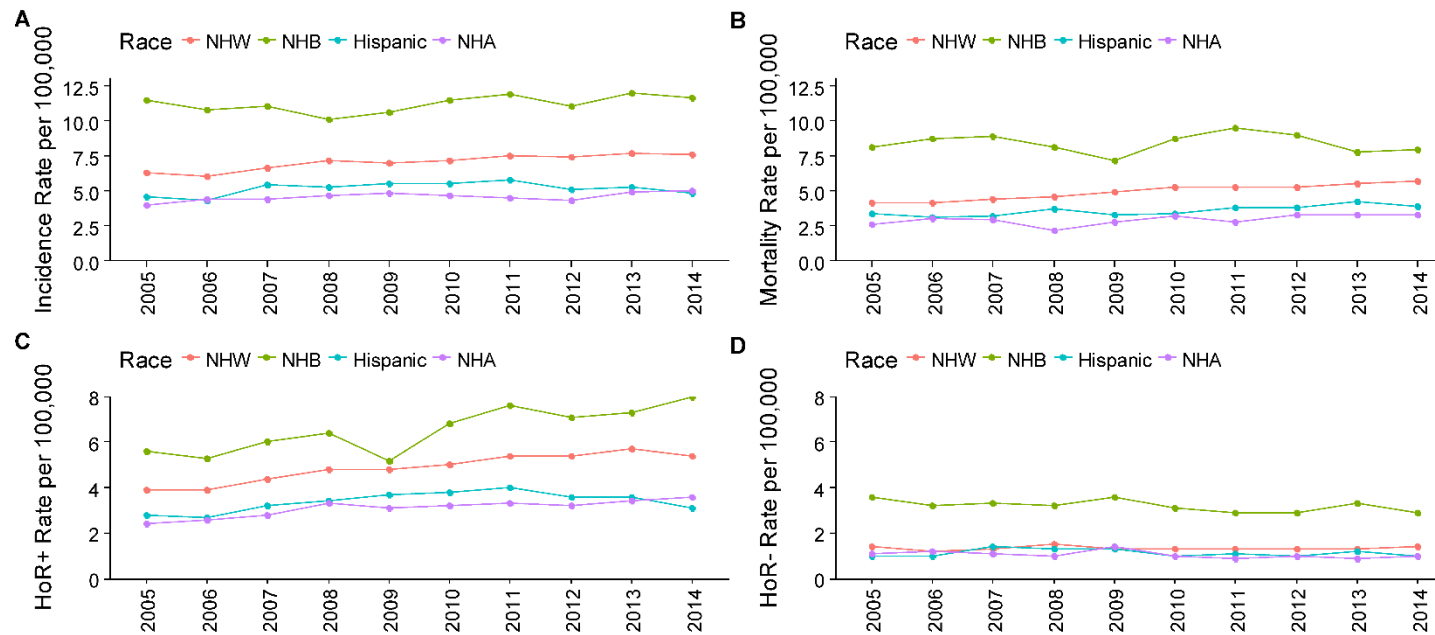

**Fig. S1.** Trends in the incidence of metastatic breast cancer incidence and incidence-based mortality rates (2005-2014) in female patients in the United States stratified by race/ethnicity. A. Trends in incidence rates. B. Trends in incidence-based mortality rates. C. Trends in the incidence of HoR-positive cases. D. Trends in the incidence of HoR-negative cases. Rates are adjusted for age based on the US standard population in 2000. HoR, hormone receptor; NHA, non-Hispanic Asian or Pacific Islander/American Indian/Alaskan Native; NHB, non-Hispanic black; NHW, non-Hispanic white. Sources: Surveillance, Epidemiology, and End Results program.

**Table S1.** Univariate and multivariate Cox proportional hazards model analysis for overall mortality

|                                      | No. of Patients | No. of Deaths | Univariate analysis |        | Multivariate analysis |        |  |
|--------------------------------------|-----------------|---------------|---------------------|--------|-----------------------|--------|--|
|                                      |                 |               | HR (95% CI)         | P      | HR (95% CI)           | P      |  |
| <b>Race</b>                          |                 |               |                     |        |                       |        |  |
| NHW                                  | 8503            | 4982          | Reference           | —      | Reference             | —      |  |
| NHB                                  | 2204            | 1469          | 1.27 (1.20-1.35)    | <0.001 | 1.12 (1.05-1.19)      | <0.001 |  |
| Hispanic                             | 1410            | 774           | 0.90 (0.84-0.97)    | 0.008  | 0.91 (0.84-0.98)      | 0.015  |  |
| NHA                                  | 949             | 501           | 0.88 (0.81-0.97)    | 0.008  | 0.95 (0.87-1.04)      | 0.291  |  |
| <b>Age at diagnosis, years</b>       |                 |               |                     |        |                       |        |  |
| One-year increase                    |                 |               | 1.02 (1.02-1.02)    | <0.001 | 1.02 (1.02-1.02)      | <0.001 |  |
| <b>Insurance status</b>              |                 |               |                     |        |                       |        |  |
| Insured                              | 9539            | 5486          | Reference           | —      | Reference             | —      |  |
| Medicaid                             | 2636            | 1677          | 1.20 (1.20-1.20)    | <0.001 | 1.20 (1.13-1.27)      | <0.001 |  |
| Uninsured                            | 891             | 563           | 1.32 (1.32-1.32)    | <0.001 | 1.31 (1.19-1.43)      | <0.001 |  |
| <b>Marital status</b>                |                 |               |                     |        |                       |        |  |
| Married                              | 5552            | 2918          | Reference           | —      | Reference             | —      |  |
| Not married                          | 6751            | 4349          | 1.45 (1.45-1.45)    | <0.001 | 1.20 (1.14-1.26)      | <0.001 |  |
| <b>Neighborhood SES</b>              |                 |               |                     |        |                       |        |  |
| Q1 (low)                             | 2515            | 1637          | Reference           | —      | Reference             | —      |  |
| Q2                                   | 2624            | 1613          | 0.92 (0.86-0.98)    | 0.014  | 0.93 (0.86-0.99)      | 0.033  |  |
| Q3                                   | 2747            | 1637          | 0.86 (0.86-0.86)    | <0.001 | 0.87 (0.81-0.94)      | <0.001 |  |
| Q4                                   | 2596            | 1471          | 0.76 (0.76-0.76)    | <0.001 | 0.81 (0.75-0.88)      | <0.001 |  |
| Q5 (high)                            | 2419            | 1278          | 0.68 (0.68-0.68)    | <0.001 | 0.76 (0.70-0.82)      | <0.001 |  |
| <b>Histological type</b>             |                 |               |                     |        |                       |        |  |
| IDC                                  | 8782            | 5030          | Reference           | —      | Reference             | —      |  |
| ILC                                  | 1372            | 798           | 0.98 (0.91-1.06)    | 0.640  | 1.09 (1.00-1.18)      | 0.042  |  |
| Others                               | 2912            | 1898          | 1.30 (1.30-1.30)    | <0.001 | 1.11 (1.05-1.18)      | <0.001 |  |
| <b>Grade</b>                         |                 |               |                     |        |                       |        |  |
| I/II                                 | 5005            | 2575          | Reference           | —      | Reference             | —      |  |
| III/UD                               | 5230            | 3323          | 1.44 (1.44-1.44)    | <0.001 | 1.35 (1.28-1.43)      | <0.001 |  |
| <b>Tumor size(mm)</b>                |                 |               |                     |        |                       |        |  |
| 0-20                                 | 1907            | 1043          | Reference           | —      | Reference             | —      |  |
| 21-50                                | 4743            | 2567          | 0.99 (0.92-1.06)    | 0.690  | 1.02 (0.95-1.09)      | 0.648  |  |
| >50                                  | 3903            | 2390          | 1.23 (1.23-1.23)    | <0.001 | 1.17 (1.09-1.26)      | <0.001 |  |
| <b>Regional lymph nodes positive</b> |                 |               |                     |        |                       |        |  |
| No                                   | 2860            | 1692          | Reference           | —      | Reference             | —      |  |
| Yes                                  | 8803            | 4993          | 0.89 (0.89-0.89)    | <0.001 | 0.93 (0.88-0.98)      | 0.011  |  |
| <b>Molecular subtype</b>             |                 |               |                     |        |                       |        |  |
| HER2-/HoR+                           | 6866            | 3794          | Reference           | —      | Reference             | —      |  |
| HER2+/HoR+                           | 1930            | 900           | 0.79 (0.79-0.79)    | <0.001 | 0.74 (0.69-0.80)      | <0.001 |  |
| HER2+/HoR-                           | 1056            | 549           | 1.00 (0.91-1.09)    | 0.990  | 0.90 (0.82-0.99)      | 0.028  |  |
| HER2-/HoR-                           | 1612            | 1314          | 2.34 (2.34-2.34)    | <0.001 | 2.13 (1.98-2.28)      | <0.001 |  |
| <b>No. of distant metastases</b>     |                 |               |                     |        |                       |        |  |
| 1                                    | 6808            | 3607          | Reference           | —      | Reference             | —      |  |
| >1                                   | 5356            | 3474          | 1.46 (1.46-1.46)    | <0.001 | 1.09 (1.03-1.15)      | 0.002  |  |
| <b>Bone</b>                          |                 |               |                     |        |                       |        |  |
| Yes                                  | 8515            | 5016          | 0.98 (0.94-1.03)    | 0.520  | 1.18 (1.12-1.25)      | <0.001 |  |
| No                                   | 4245            | 2486          | Reference           | —      | Reference             | —      |  |
| <b>Brain</b>                         |                 |               |                     |        |                       |        |  |
| Yes                                  | 938             | 765           | 2.23 (2.23-2.23)    | <0.001 | 1.97 (1.82-2.13)      | <0.001 |  |
| No                                   | 11567           | 6567          | Reference           | —      | Reference             | —      |  |
| <b>Liver</b>                         |                 |               |                     |        |                       |        |  |
| Yes                                  | 3412            | 2353          | 1.65 (1.65-1.65)    | <0.001 | 1.78 (1.69-1.88)      | <0.001 |  |
| No                                   | 9218            | 5060          | Reference           | —      | Reference             | —      |  |
| <b>Lung</b>                          |                 |               |                     |        |                       |        |  |
| Yes                                  | 3891            | 2608          | 1.51 (1.51-1.51)    | <0.001 | 1.26 (1.20-1.33)      | <0.001 |  |
| No                                   | 8636            | 4732          | Reference           | —      | Reference             | —      |  |

Abbreviations: CI, confidence interval; HER2, human epidermal growth factor receptor-2; HoR, hormone receptor; HR, hazard ratio; IDC, invasive ductal carcinoma; ILC, invasive lobular carcinoma; NHA, non-Hispanic Asian or Pacific Islander/American Indian/Alaska Native; NHB, non-Hispanic black; NHW, non-Hispanic white; Q, quintile; SES, socioeconomic status; UD, undifferentiated.

a. Including divorced, separated, single (never married), and widowed.

**Table S2.** HRs for death resulting from breast cancer in NHB and NHW patients

| Age   | Race               | No. of Patients | No. of Deaths | Model one <sup>a</sup> | Model two <sup>b</sup> | Model three <sup>c</sup> | Model four <sup>d</sup> | Model five <sup>e</sup> | Model six <sup>f</sup> |
|-------|--------------------|-----------------|---------------|------------------------|------------------------|--------------------------|-------------------------|-------------------------|------------------------|
|       |                    |                 |               | HR (95% CI)            | HR (95% CI)            | HR (95% CI)              | HR (95% CI)             | HR (95% CI)             | HR (95% CI)            |
| Total | NHW (reference)    | 8503            | 4507          | 1.00                   | 1.00                   | 1.00                     | 1.00                    | 1.00                    | 1.00                   |
|       | NHB v NHW          | 2204            | 1328          | 1.24 (1.16-1.31)       | 1.33 (1.25-1.42)       | 1.08 (1.01-1.15)         | 1.14 (1.07-1.21)        | 1.20 (1.13-1.28)        | 1.07 (1.00-1.15)       |
|       | ERR, %             |                 |               | 23.6                   | 33.1                   | 7.9                      | 13.8                    | 20.1                    | 7.2                    |
|       | Explainable ERR, % |                 |               |                        | -40.3                  | 66.5                     | 41.5                    | 14.8                    | 69.5                   |
| 18-34 | NHW (reference)    | 188             | 68            | 1.00                   | 1.00                   | 1.00                     | 1.00                    | 1.00                    | 1.00                   |
|       | NHB v NHW          | 111             | 51            | 1.50 (1.04-2.15)       | 1.50 (1.04-2.15)       | 1.26 (0.83-1.90)         | 1.25 (0.84-1.87)        | 1.33 (0.90-1.96)        | 1.00 (0.63-1.58)       |
| 35-44 | NHW (reference)    | 571             | 229           | 1.00                   | 1.00                   | 1.00                     | 1.00                    | 1.00                    | 1.00                   |
|       | NHB v NHW          | 261             | 144           | 1.67 (1.36-2.07)       | 1.68 (1.36-2.07)       | 1.40 (1.12-1.76)         | 1.43 (1.15-0.78)        | 1.64 (1.32-2.05)        | 1.36 (1.07-1.74)       |
|       | ERR, %             |                 |               | 67.0                   | 67.6                   | 40.3                     | 42.6                    | 64.4                    | 36.1                   |
|       | Explainable ERR, % |                 |               |                        | -0.8                   | 39.9                     | 36.4                    | 3.9                     | 46.1                   |
| 45-54 | NHW (reference)    | 1525            | 711           | 1.00                   | 1.00                   | 1.00                     | 1.00                    | 1.00                    | 1.00                   |
|       | NHB v NHW          | 537             | 316           | 1.49 (1.31-1.70)       | 1.49 (1.31-1.70)       | 1.18 (1.02-1.37)         | 1.29 (1.12-1.48)        | 1.43 (1.24-1.64)        | 1.02 (0.88-1.19)       |
|       | ERR, %             |                 |               | 49.0                   | 49.3                   | 18.2                     | 28.7                    | 42.5                    | 2.3                    |
|       | Explainable ERR, % |                 |               |                        | -0.6                   | 62.9                     | 41.4                    | 13.3                    | 95.3                   |
| 55-64 | NHW (reference)    | 2346            | 1252          | 1.00                   | 1.00                   | 1.00                     | 1.00                    | 1.00                    | 1.00                   |
|       | NHB v NHW          | 661             | 426           | 1.43 (1.28-1.59)       | 1.43 (1.28-1.59)       | 1.22 (1.09-1.37)         | 1.30 (1.17-1.45)        | 1.42 (1.28-1.59)        | 1.15 (1.02-1.29)       |
|       | ERR, %             |                 |               | 42.5                   | 42.6                   | 22.4                     | 30.1                    | 42.2                    | 14.5                   |
|       | Explainable ERR, % |                 |               |                        | -0.2                   | 47.3                     | 29.2                    | 0.7                     | 65.9                   |
| 65-74 | NHW (reference)    | 1974            | 1082          | 1.00                   | 1.00                   | 1.00                     | 1.00                    | 1.00                    | 1.00                   |
|       | NHB v NHW          | 360             | 205           | 1.06 (0.92-1.23)       | 1.06 (0.91-1.23)       | 1.02 (0.87-1.19)         | 0.99 (0.85-1.15)        | 1.09 (0.93-1.26)        | 0.97 (0.82-1.13)       |
| 75+   | NHW (reference)    | 1899            | 1165          | 1.00                   | 1.00                   | 1.00                     | 1.00                    | 1.00                    | 1.00                   |
|       | NHB v NHW          | 274             | 186           | 1.17 (1.00-1.36)       | 1.19 (1.01-1.38)       | 1.12 (0.95-1.31)         | 1.12 (0.96-1.30)        | 1.14 (0.98-1.33)        | 1.06 (0.89-1.26)       |

Abbreviations: CI, confidence interval; ERR, excess relative risk; HR, hazard ratio; NHB, non-Hispanic black; NHW, non-Hispanic white.

a. Model one: race.

b. Model two: race, plus age at diagnosis.

c. Model three: race, plus socioeconomic factors (insurance type, marital status and neighborhood socioeconomic status).

d. Model four: race, plus tumor characteristics (histological type, grade, tumor size, regional lymph nodes, and molecular subtype).

e. Model five: race, plus metastatic pattern (number and site of distant metastases).

f. Model six: race, plus age at diagnosis, socioeconomic factors, tumor characteristics, and metastatic pattern.

**Table S3.** HRs for death resulting from any cause in NHB and NHW patients

| Age   | Race               | No. of Patients | No. of Deaths | Model one <sup>a</sup> | Model two <sup>b</sup> | Model three <sup>c</sup> | Model four <sup>d</sup> | Model five <sup>e</sup> | Model six <sup>f</sup> |
|-------|--------------------|-----------------|---------------|------------------------|------------------------|--------------------------|-------------------------|-------------------------|------------------------|
|       |                    |                 |               | HR (95% CI)            | HR (95% CI)            | HR (95% CI)              | HR (95% CI)             | HR (95% CI)             | HR (95% CI)            |
| Total | NHW (reference)    | 8503            | 4982          | 1.00                   | 1.00                   | 1.00                     | 1.00                    | 1.00                    | 1.00                   |
|       | NHB v NHW          | 2204            | 1469          | 1.27 (1.20-1.35)       | 1.41 (1.33-1.50)       | 1.08 (1.02-1.15)         | 1.18 (1.12-1.26)        | 1.24 (1.17-1.31)        | 1.12 (1.05-1.19)       |
|       | ERR, %             |                 |               | 27.2                   | 41.1                   | 8.4                      | 18.5                    | 24.9                    | 11.9                   |
|       | Explainable ERR, % |                 |               |                        | -51.3                  | 68.9                     | 32.0                    | 12.0                    | 56.3                   |
| 18-49 | NHW (reference)    | 1384            | 605           | 1.00                   | 1.00                   | 1.00                     | 1.00                    | 1.00                    | 1.00                   |
|       | NHB v NHW          | 589             | 345           | 1.67 (1.46-1.91)       | 1.70 (1.49-1.93)       | 1.35 (1.17-1.56)         | 1.44 (1.25-1.65)        | 1.60 (1.40-1.83)        | 1.25 (1.08-1.45)       |
|       | ERR, %             |                 |               | 67.2                   | 70.4                   | 34.9                     | 43.6                    | 60.3                    | 25.3                   |
|       | Explainable ERR, % |                 |               |                        | -4.9                   | 48.1                     | 35.1                    | 10.3                    | 62.4                   |
| 50-64 | NHW (reference)    | 3246            | 1800          | 1.00                   | 1.00                   | 1.00                     | 1.00                    | 1.00                    | 1.00                   |
|       | NHB v NHW          | 981             | 671           | 1.52 (1.39-1.66)       | 1.54 (1.41-1.68)       | 1.26 (1.14-1.38)         | 1.39 (1.27-1.52)        | 1.52 (1.39-1.66)        | 1.19 (1.08-1.31)       |
|       | ERR, %             |                 |               | 52.2                   | 53.6                   | 25.9                     | 39.2                    | 51.9                    | 19.0                   |
|       | Explainable ERR, % |                 |               |                        | -2.7                   | 50.4                     | 24.9                    | 0.8                     | 63.6                   |
| 65+   | NHW (reference)    | 3873            | 2577          | 1.00                   | 1.00                   | 1.00                     | 1.00                    | 1.00                    | 1.00                   |
|       | NHB v NHW          | 634             | 453           | 1.14 (1.04-1.26)       | 1.18 (1.07-1.31)       | 1.04 (0.93-1.15)         | 1.08 (0.98-1.20)        | 1.13 (1.02-1.24)        | 1.01 (0.91-1.12)       |

Abbreviations: CI, confidence interval; ERR, excess relative risk; HR, hazard ratio; NHB, non-Hispanic black; NHW, non-Hispanic white.

a. Model one: race.

b. Model two: race, plus age at diagnosis.

c. Model three: race, plus socioeconomic factors (insurance type, marital status and neighborhood socioeconomic status).

d. Model four: race, plus tumor characteristics (histological type, grade, tumor size, regional lymph nodes, and molecular subtype).

e. Model five: race, plus metastatic pattern (number and site of distant metastases).

f. Model six: race, plus age at diagnosis, socioeconomic factors, tumor characteristics, and metastatic pattern.

**Table S4.** % of Women With Stage IV Breast Cancer, by Race/Ethnicity

|                         | 18-49        |            |            | 50-64        |            |            |
|-------------------------|--------------|------------|------------|--------------|------------|------------|
|                         | <b>Total</b> | <b>NHW</b> | <b>NHB</b> | <b>Total</b> | <b>NHW</b> | <b>NHB</b> |
| No. of patients         | 20.9         | 16.3       | 26.7       | 39.8         | 38.2       | 44.5       |
| Triple negative subtype | 14.4         | 12.6       | 20         | 12.6         | 11.2       | 19.7       |
| Brain metastases        | 7.3          | 6.4        | 8.8        | 8.2          | 8.1        | 8.6        |
| Tumor size >50 mm       | 31.9         | 26.8       | 36.5       | 30.6         | 28.3       | 35.1       |
| Positive lymph nodes    | 75.5         | 72.3       | 79.3       | 70..9        | 69.4       | 74.7       |
| Multi-site metastases   | 41.9         | 40         | 46.7       | 43.4         | 42         | 45.5       |

Abbreviations: NHB, non-Hispanic black; NHW, non-Hispanic white.
